# Supplementary material for: Brain-Targeted Delivery of Pre-miR-29b Using Lactoferrin-Stearic Acid-Modified-Chitosan/Polyethyleneimine Polyplexes
Source: PubMed Central journal article supplement (PMC7602608; doi:10.3390/ph13100314), 2020-10-15
Supplement: pharmaceuticals-13-00314-s001.pdf [file pharmaceuticals-13-00314-s001.pdf]

# **Brain-targeted delivery of pre-miR-29b using lactoferrin-stearic acid-modified–Chitosan/Polyethylenimine polyplexes**

Patrícia Pereira<sup>1,2</sup>, Maria Barreira<sup>1</sup>, Carla Cruz<sup>1</sup>, Joana Tomás<sup>1</sup>, Ângelo Luís<sup>1</sup>, Augusto Q. Pedro<sup>3</sup>, João A. Queiroz<sup>1</sup> and Fani Sousa<sup>1,\*</sup>

<sup>1</sup> CICS-UBI – Health Sciences Research Centre, University of Beira Interior, Avenida Infante D. Henrique, Covilhã 6200-506, Portugal

<sup>2</sup> University of Coimbra, Centre for Mechanical Engineering, Materials and Processes, Department of Chemical Engineering, Rua Sílvio Lima-Polo II, 3030-790 Coimbra, Portugal

<sup>3</sup> CICECO – Aveiro Institute of Materials, Chemistry Department, University of Aveiro, Campus Universitário de Santiago, 3810-193 Aveiro, Portugal

\*Corresponding author:

Dr. Fani Sousa

Phone: +351 275 329 074

Fax: +351 275 329 099

E-mail address: fani.sousa@fcsaude.ubi.pt

Postal address: Health Sciences Research Centre, University of Beira Interior, Avenida Infante D. Henrique, Covilhã, 6200-506, Portugal

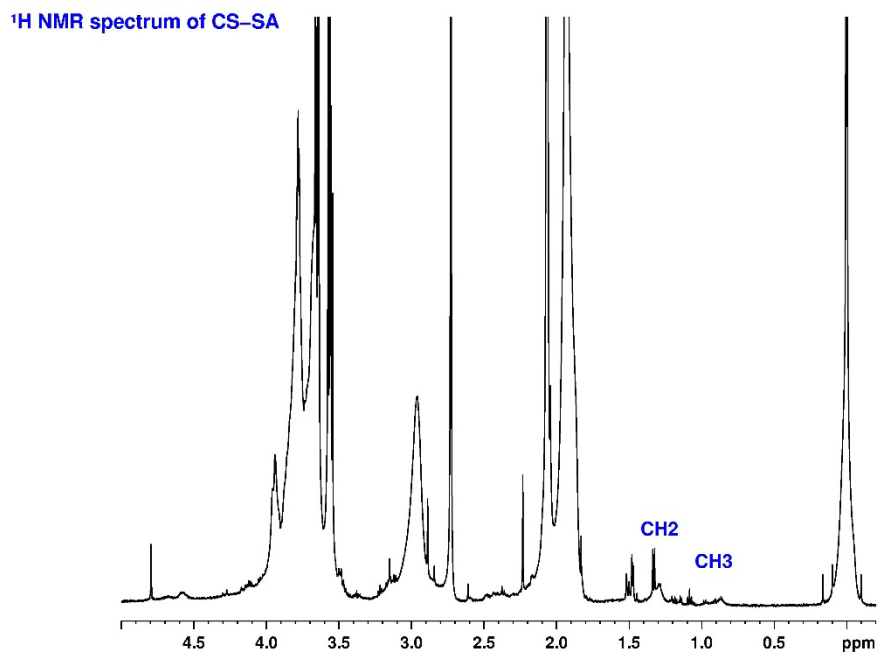

**Figure S1** - <sup>1</sup>H NMR spectrum of stearic acid-chitosan (CS-SA) conjugate.

The spectrum of the CS-SA shows 3 broad peaks, which correspond to the resonance of the monosaccharide residue protons, namely a signal at  $\delta$  1.5 ppm of the carboxyl group (-COCH<sub>3</sub>), the methylene group (-CH-NH-) next to hydroxyl group at 2.88 ppm and the internal CH/CH<sub>2</sub> groups in the chitosan ring at 3.61–4.0 ppm.

<sup>1</sup>H NMR spectrum of PEI-SA

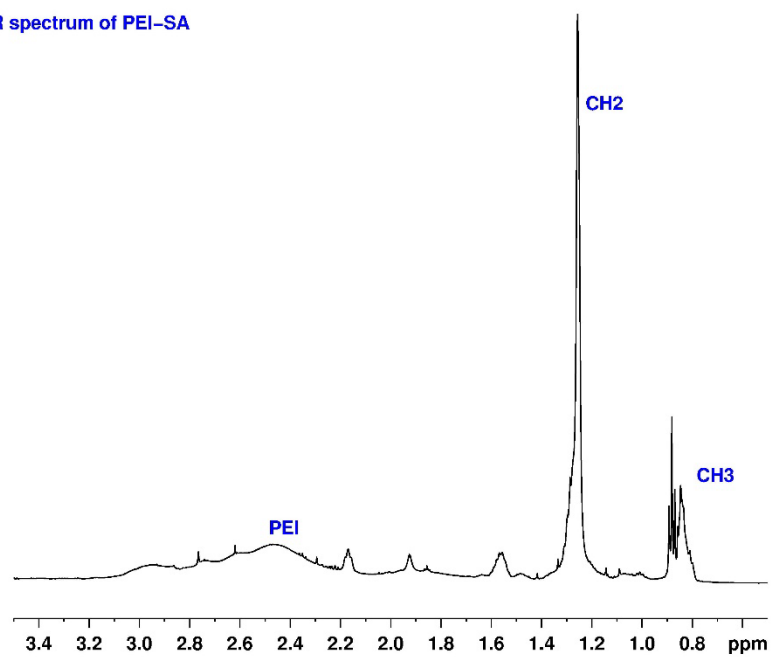

Figure S2 - <sup>1</sup>H NMR spectrum of stearic-polyethyleneimine (PEI-SA conjugate).

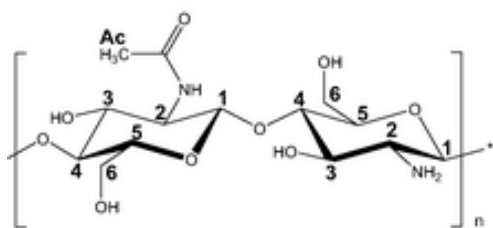

Figure S3 - Chemical structure of chitosan (CS).

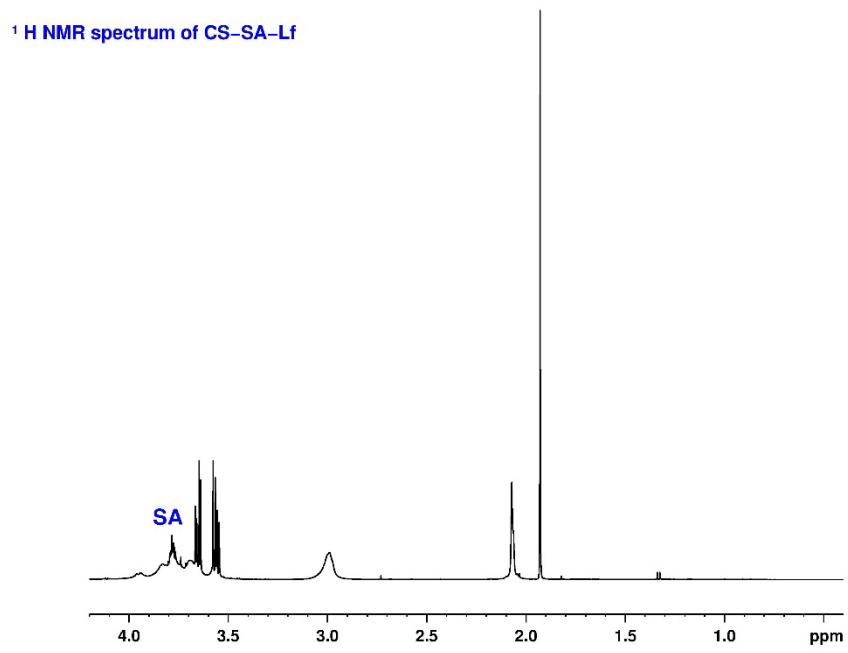

**Figure S4** - <sup>1</sup>H NMR spectrum of chitosan-stearic acid (CS-SA) conjugate coupling to lactoferrin (Lf) in D<sub>2</sub>O.

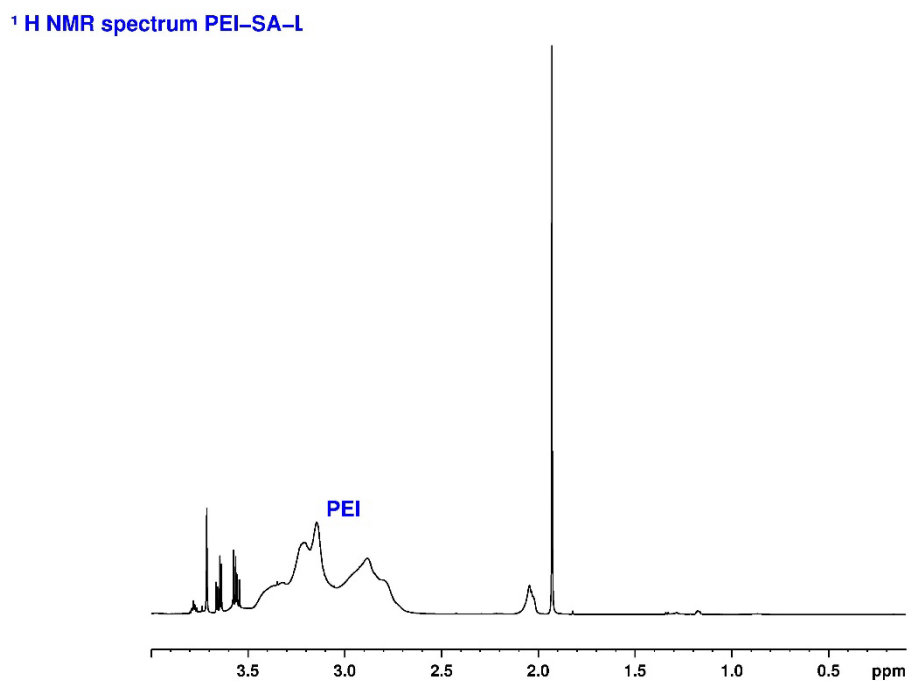

**Figure S5** - <sup>1</sup>H NMR spectrum of polyethyleneimine-stearic acid (PEI-SA) conjugate coupling to lactoferrin (Lf) in D<sub>2</sub>O.

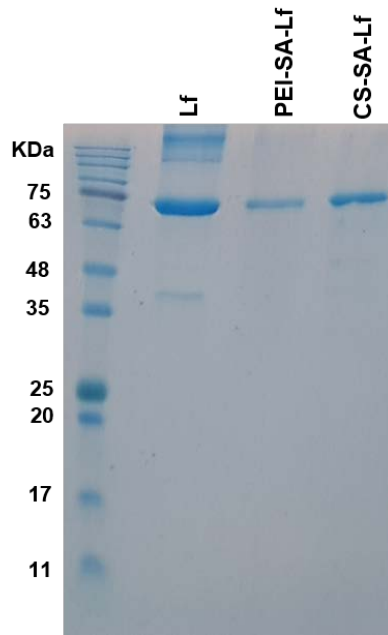

**Figure S6** - SDS-PAGE of the PEI-SA-Lf and CS-SA-Lf conjugates.

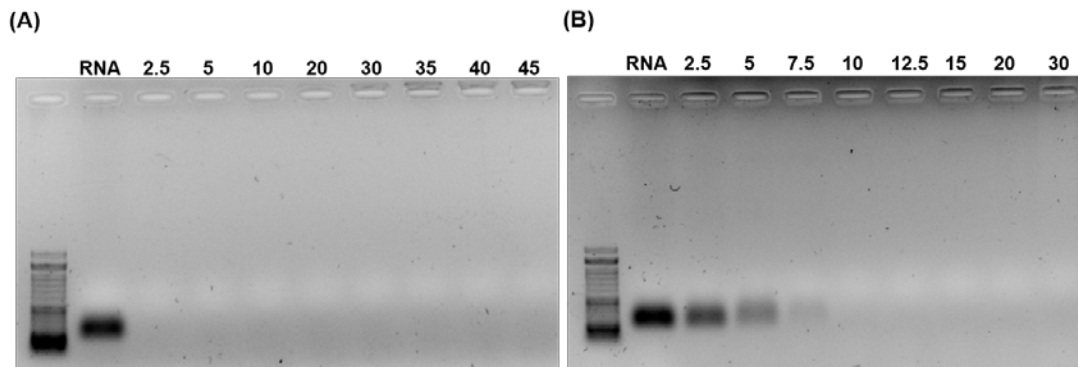

**Figure S7** - Agarose gel electrophoresis of polyplexes at various N/P ratios: **(A)** CS-SA/RNA and **(B)** PEI-SA/RNA. The first lane of the gel corresponds to the molecular weight marker and the second lane corresponds to free pre-miR-29b. The numbers in each lane indicate the N/P ratios. Each experiment was performed three times.

According to the electrophoresis analysis shown in Figure S7, it was possible to observe that the RNA complexation by CS-SA conjugates starts at very low ratios, namely  $N/P=2.5$ , suggesting that RNA is fully complexed. In turn, in the case of the PEI-SA/RNA polyplexes, it was observed that the lanes corresponding to the N/P ratios of 2.5, 5 and 7.5 contain free RNA. However, above the N/P ratio of 7.5,

the band corresponding to free RNA was not observed, indicating that the RNA was efficiently conjugated with the PEI-SA.

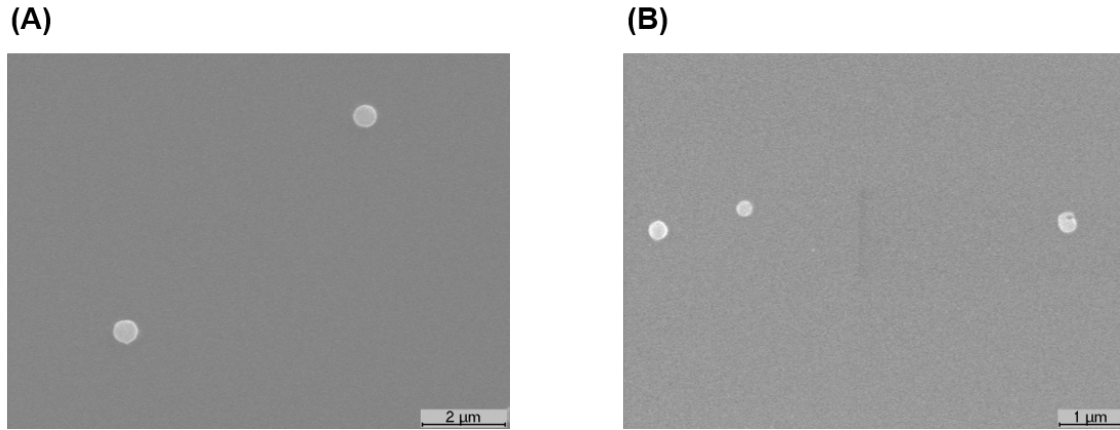

**Figure S8** – SEM images for CS/PEI modified with stearic acid and lactoferrin: (A) CS-SA-Lf/RNA and (B) PEI-SA-Lf/RNA.

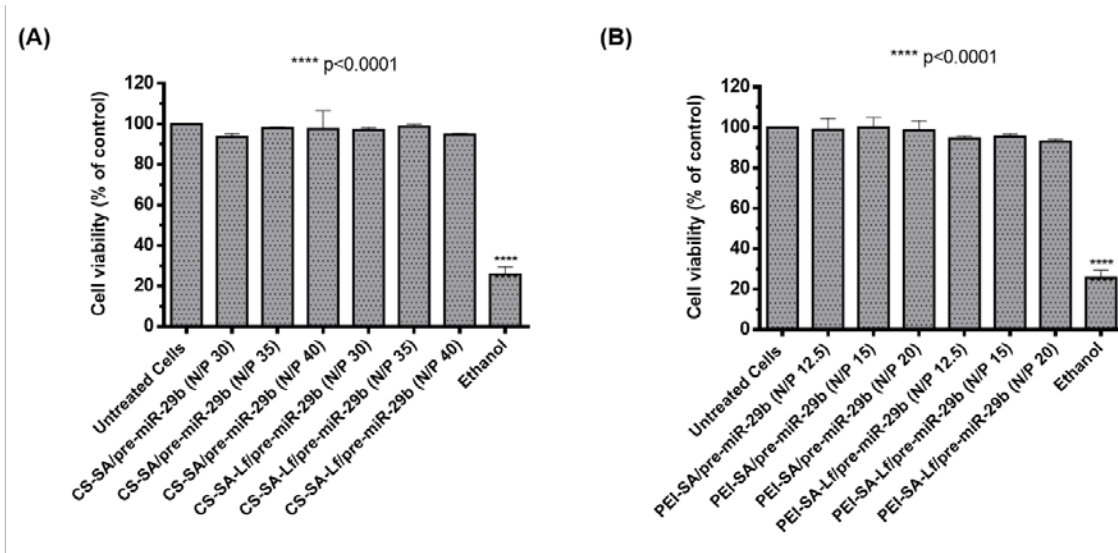

**Figure S9** – Relative cell viability of N2A695 cells treated with different pre-miR-29b-loaded polyplexes at various N/P ratios for 72 hours: (A) CS-based polyplexes and (B) PEI-based polyplexes.

### CS-SA/pre-miR-29b

### CS-SA-Lf/pre-miR-29b

0 h

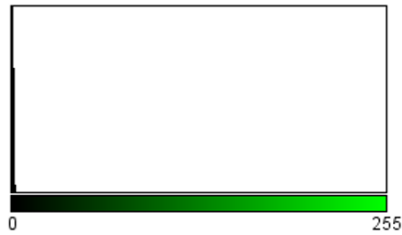

Count: 52428800    Min: 0  
Mean: 0.00178    Max: 39  
StdDev: 0.0478    Mode: 0 (52342973)

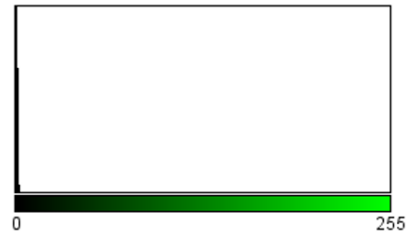

Count: 73400320    Min: 0  
Mean: 0.00128    Max: 59  
StdDev: 0.0420    Mode: 0 (73314430)

0.5 h

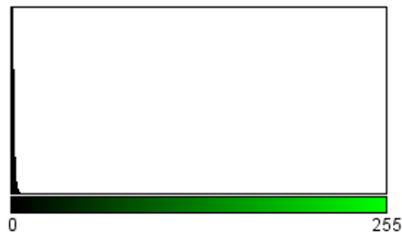

Count: 62914560    Min: 0  
Mean: 0.226    Max: 167  
StdDev: 1.077    Mode: 0 (55354240)

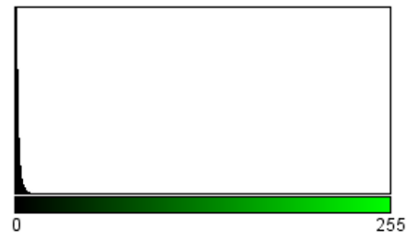

Count: 52428800    Min: 0  
Mean: 0.820    Max: 255  
StdDev: 2.371    Mode: 0 (35601576)

1 h

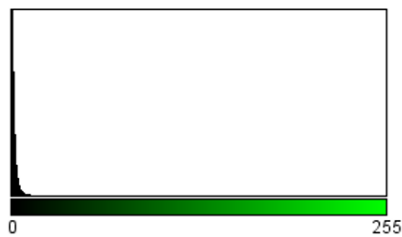

Count: 15728640    Min: 0  
Mean: 1.185    Max: 249  
StdDev: 3.427    Mode: 0 (9865583)

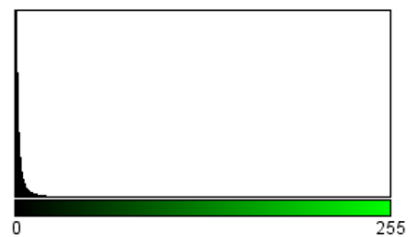

Count: 62914560    Min: 0  
Mean: 2.241    Max: 255  
StdDev: 6.614    Mode: 0 (37110140)

1.5 h

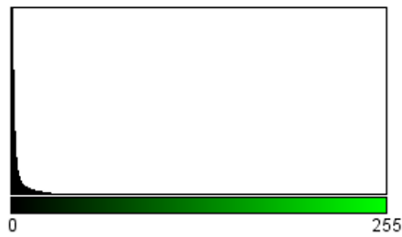

Count: 62914560    Min: 0  
Mean: 2.769    Max: 212  
StdDev: 5.986    Mode: 0 (33929444)

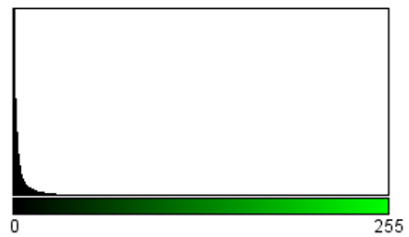

Count: 62914560    Min: 0  
Mean: 5.002    Max: 255  
StdDev: 8.988    Mode: 0 (20101956)

2 h

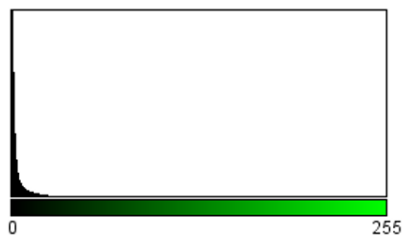

Count: 62914560    Min: 0  
Mean: 2.438    Max: 216  
StdDev: 5.240    Mode: 0 (34149685)

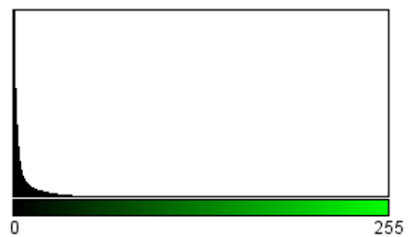

Count: 62914560    Min: 0  
Mean: 6.851    Max: 255  
StdDev: 10.874    Mode: 0 (16558960)

**Figure S10** – Histogram of FITC-fluorescence intensity obtained by confocal microscopy on N2a695 cells.
